# Supplementary material for: Lyapunov-based control for enhanced trajectory tracking in robotic arms using multi-objective particle swarm optimization
Source: PeerJ journal article supplement (doi:10.7717/peerj-cs.3397), 2025-11-27
Supplement: SUPPMaterial.docx [file SUPPMaterial.docx]

**Figure S1** Lyapunov- based PID control.

**Figure S2** Simulation framework

**Gear Shape Trajectory**

**Figure S3** (a) Cumulative MSE and overshoot in the X and Z directions during gear shaped trajectory using a PID controller. (b) Control torques applied to Joint 1 and Joint 2.

**Figure S4** (a) End-effector force response for gear-shaped trajectory tracking with a classical PID controller. (b) Steady-state tracking error along the X and Z axes. Maximum error reaches about 0.022 m in X and 0.007 m in Z initially, with the value remaining below 0.003 m after 50 seconds.

**Spiral Trajectory**

Spiral trajectory involves constantly changing curvatures, curving outwards (Draelos 2023). Its mathematical expression is in equations 1 and 2:

(1)

(2)

where *a* sets the initial radius and defines the radial growth rate per revolution.

The spiral path involves continuous expansion in terms of radius, and it is challenging for the controller to maintain a high level of positioning accuracy while accommodating increased distance from the origin. Performance in simulation for the spiral path is represented in Figure S5 (a), (b), and (c) comparing the desired path with the path traveled by the Lyapunov-PID optimized, non-optimized Lyapunov-PID, and PID only controller The optimized MOPSO PID controller's performance was also quantitatively compared to a Lyapunov based PID controller and to a traditional fixed gain PID controller based on some of the most important trajectory tracking and disturbance rejection measures. For X axis of steady state error, Lyapunov PID controller obtains a 51% smaller value than MOPSO PID (0.00029 m vs. 0.00059 m), and traditional PID controller obtains a 47% decrease (0.00031 m vs. 0.00059 m). For the Z axis, Lyapunov PID and traditional PID controllers obtain a 48% and 51% decrease in steady state error respectively than MOPSO PID. Despite this, the MOPSO PID demonstrates significant improvements in other essential performance indexes. For instance, the MSE on the X axis is reduced by 46% and 47% when contrasted with the Lyapunov-PID and classical PID controllers, respectively. MSE reduction for the Z axis is again larger and approximately 73% smaller for both types of controllers. Overshoot in both axes is also significantly reduced with MOPSO PID. Overshoot in the X axis is cut back by nearly 49% relative to both the Lyapunov PID and classical PID controllers. Overshoot reduction is even greater in the Z axis, with 68% lower values of overshoot in the case of the MOPSO PID, relative to the two comparison controllers. In control effort, the overall effort of the MOPSO-PID is in fact larger through the addition of only 0.8% relative to the scenarios of the Lyapunov-PID and classical PID. Such an infinitesimal increase is sufficiently justified through the massive increases in accuracy in following the track and avoiding overshoot. Interestingly, the controller of the MOPSO PID excels in disturbance rejection according to recovery times following the occurrence of disturbance. The X-axis and Z-axis recovery time are decreased by 98% (0.102 s vs. 4.19 s for Lyapunov-PID) and by 99% (0.030 s vs. 3.94 s), respectively, significantly better than both fixed-gain controllers.

**Figure S5** (a) Spiral path tracking for MOPSO + Lyapunov-based PID controller. (b) Spiral path for Lyapunov-based PID controller. (c) Spiral for PID controller.

Figure S6 (a) and (b) show the control performance of a two degrees of freedom robotic arm tracing a spiral shaped path with a Lyapunov based PID controller optimized through the MOPSO algorithm. Figure S6 (a) plots the cumulative MSE and overshoots against the X and Z axes. MSE for the X axis starts at roughly and decreases below during the first 50 seconds. But after 100 seconds, the MSE increases steadily, peaking at roughly , which shows a slow track precision loss with increasing time. For the Z axis, the MSE drops from roughly , then continues upward through . The overshoot plots show values mostly below 0.01 m in both directions. For the X direction, overshoot remains lower than 0.005 m for most of the simulation, with rare spikes to 0.03 m. For the Z direction, overshoot rises substantially after 100 s, to 0.015 m, especially near the outer extremes of the spiral track. Figure S6 (b) shows the torque profiles of Joint 1 and Joint 2, the torque of Joint 1, has a sinusoidal shape with amplitudes varying from about –40 Nm to 50 Nm, and the frequency matches that of the radial expansion of the spiral. Joint 2 shows the same waveform with lower amplitude variations of about –20 Nm to 20 Nm. Smooth, periodic, and continuous nature of the torque signals indicate the controller had properly synchronized itself with the geometry of the spiral and provided continuous, coordinated joint actuation without sudden jumps.

**Figure S6** (a) Cumulative MSE and overshoot in the X and Z directions during spiral trajectory tracking using a Lyapunov-PID controller optimized with MOPSO. (b) Torque signals of Joint 1 and Joint 2.

Figure S7 (a) and (b) present the end-effector force response and steady-state tracking error, respectively, in the execution of a spiral trajectory under the control of a Lyapunov PID controller which is optimized with MOPSO. The magnitude of the total end effector force in Figure S7 (a) exhibits a clear oscillatory nature, both amplitude and frequency, which could be as high as around 60 N. The X and Z components exhibit similar sinusoidal nature, which oscillates between approximately about –30 N and 60 N along the X axis and between about –20 N and 20 N along the Z axis. The periodicity of the force signals indicates the smoothness of the spiral path together with the constant actuating profile selected by the controller while performing the task. Figure S7 (b) provides the steady state X and Z direction tracking error. The X direction error varies near 0.01 m for most of the path, with peak values in certain cases being 0.04–0.05 m. The error in the Z direction is kept below 0.015 m; but rises with inclination at the final time of simulation.

**Figure S7** (a) Force response for spiral path tracking of a Lyapunov-PID controller optimized using MOPSO. (b) Steady-state tracking error in the X and Z axes.

Figure S8 (a) and (b) indicate the performance of a two degrees of freedom robotic manipulator for spiral trajectory tracking with a Lyapunov based PID controller and gains chosen manually. The resulting MSE accumulation plus overshoot in X and Z directions appear in Figure S8 (a). The MSE in the X axis starts about and decreases smoothly down below with convergence. The MSE in the Z axis is similar, with startup about and convergence below. The overshoot in the X direction peaks at just over 0.04 m in initial movement before decreasing to less than 0.01 m. For the Z axis, overshoot is less than 0.025 m with repeated cycling in keeping with the cyclic trajectory. The joint torques applied in the task appear in Figure S8 (b). Joint 1 () exhibits a clear sinusoidal profile, alternating between –40 Nm and 40 Nm. Joint 2 () also alternates between –10 Nm and 10 Nm. These cyclic rotational waveforms of the two joints comply with the continuous curvature of the spiral trajectory.

**Figure S8** (a) Cumulative MSE and overshoot in X and Z directions. (b) Joint 1 and Joint 2 torque profiles.

Figure S9 (a) and (b) are the end-effector force response and steady state tracking error of a robotic manipulator for the execution of spiral trajectories under a Lyapunov based PID controller, respectively. In Figure S9 (a), the end-effector force norm ∣Fee∣ varies between roughly 10 N and 60 N, tracing a smooth, oscillatory curve corresponding to the spiral’s curvature. The  component varies from –20 N to 60 N, and the ​ component stays largely between –20 N and 40 N. While the forces are regular, tiny initial perturbations and irregular peaks are visible in the initial seconds, potentially due to the settling of the controller. Figure S9 (b) shows the steady-state error along the X and Z axes. The X axis error reaches a maximum near 0.035 m in the first seconds and again at 250 seconds, with intermediate values ranging from 0.005 m to 0.015 m. The Z-axis error also exhibits the same pattern, reaching as high as 0.025 m at various parts of the track. The repetitive patterns of the error are due to the spiral's changes in curvature.

**Figure S9** (a) Force response of the end-effector while tracing the spiral path with the usage of a Lyapunov PID controller without MOPSO optimization. (b) Steady-state error in the X and Z directions.

Figure S10 (a) and (b) show the performance of controlling the robot manipulator tracing the spiral pattern using a classical PID controller. In Figure S10 (a), the cumulative MSE and overshoot along the X and Z directions are shown. The MSE along the X direction begins at approximately and steadily drops down, plateauing below. The same pattern is adopted by the Z direction, with the MSE reducing from down through below. The overshoot along the X axis is high at 0.04 m early on, while on the Z axis the overshoot is high at as much as 0.025 m, and they exhibit periodic behaviors for the entire motion. In Figure S10 (b), Joint 1 and Joint 2's torque profiles are shown. Joint 1 stays inside -40 Nm and 40 Nm, while Joint 2 stays between -10 Nm and 10 Nm. The torques have periodic smooth waveform behaviors that are in sync on the dynamics of the spiral motion. The signal constancy indicates synchronized action at the joint, although an early peak in the torque indicates probable transient mismatches early on during the first period of motion.

**Figure S10** (a) Cumulative MSE and overshoot in X- and Z-directions of the classical PID controller while it tracks the spiral trajectory. The MSE decreases steadily, while the overshoot has periodic variation, large initial spikes. (b) Joint torque patterns. Periodic, regular torque signals are observed in both joints, although higher amplitude in Joint 1.

These graphs illustrate the response of a robot manipulator that follows a spiral path with classical PID control of constant, non-optimized gains.

Figure S11 (a) provides the end-effector force response. The overall system force norm ranges between around 10 N and 60 N and exhibits a steady sinusoidal profile characteristic of the spiral geometry. The component of the force varies between –20 N and 60 N, and the component ranges between –50 N and 30 N. The sudden transients observed within the first 20 seconds of the path indicate that the controller's startup response is inadequately damped, although it eventually stabilizes as the manipulator adheres to the designated path. Figure S11 (b) shows that the error along the X reaches a high of around 0.04 m at the beginning and exhibits fluctuations of between 0.005 m to 0.02 m throughout the entire task period. The error along the Z starts at around 0.025 m, with steady fluctuations of between 0.005 m to 0.015 m level.

**Figure S11** (a) End-effector force response of the classical PID controller for tracking a spiral trajectory. The force signals are of periodic nature, high amplitude, and initial transients due to the non-optimized tuning of gains. (b) Steady state track error in the Z and X directions. The error is bounded with appreciable fluctuations in the entire track, especially at high curvature regions.

Figure S12 illustrates the Pareto front generated by the MOPSO optimization algorithm, which was applied to the Lyapunov PID controller for tracking spiral trajectories. The horizontal axis represents the overall tracking error (ET), while the vertical axis represents the control effort (EC).

**Figure S12** Pareto front obtained through the MOPSO-based optimization of the Lyapunov PID controller for the aim of spiral trajectory following. The plot indicates the trade-off between control effort (EC) and overall tracking error (ET).

Table S1 shows a detailed quantitative comparison between the three considered control schemes: MOPSO optimized Lyapunov PID, non-optimized Lyapunov PID, and conventional PID

**Table S1** Comparison of the control strategies in spiral trajectory tracking based on gains, overshoot, torque, and recovery time.

**Rose Curve Trajectory**

The rose curve path forms several complex patterns and several petals (Saleem, O et al., 2024). The mathematical expressions for such a geometry are shown in equations 3, 4, and 5:

, (3)

(4)

(5)

where is the amplitude, sets the number of lobes, and is the parameter sweeping from 0 to

The rose curve trajectory, characterized by its petal-shaped motion and complex behavior, serves as an ideal subject for evaluating the tracking ability of a controller designed for nonlinear and difficult to analyze movements. Figure S13 compares three approaches: (a) the optimized method (using MOPSO combined with a Lyapunov-based PID controller), (b) the non-optimized method (using only a Lyapunov-based PID controller), and (c) a standard PID controller.

The optimized MOPSO Lyapunov PID controller was further quantitatively compared with a Lyapunov based PID controller and with a conventional fixed gain PID controller using some of the most significant trajectory tracking and disturbance rejection measures. For steady state X axis error, the Lyapunov PID controller gets a 51% lower value compared with the MOPSO PID (0.00029 m vs. 0.00059 m), and the conventional PID controller gets a 47% reduction (0.00031 m vs. 0.00059 m). For the Z-axis, the Lyapunov-PID and conventional PID controllers achieve a 48% and 51% reduction in steady-state error respectively compared with the MOPSO-PID. Despite this, the MOPSO Lyapunov PID shows considerable enhancement in other important performance indexes. For one, the X axis MSE is lowered by 46% and 47% when compared with the respective comparison with the Lyapunov PID and classical PID controllers. MSE reductions for the Z axis are again larger and well over 73% lower for each controller type. Overshoots in each of the two axes are also significantly reduced with MOPSO Lyapunov PID. In the X axis, the overshoot is reduced by nearly 49% when compared with the respective comparison with the Lyapunov PID and conventional PID controllers. The reduction is even more pronounced in the Z axis, with the overshoot values 68% lower than the MOPSO Lyapunov PID case with respect to the comparison controllers. In terms of control effort, the MOPSO Lyapunov PID controller's total effort is marginally higher by virtue of increasing just 0.8% relative to the comparison with the Lyapunov PID and conventional PID scenarios. Such an infinitesimal increase is more than adequately explained by the gains in tracking precision and avoidance of overshoots. Something particularly standing out with the MOPSO Lyapunov PID controller demonstrates a clear advantage in terms of disturbance rejection using recovery time measures following disturbances applied. The recovery time for the X axis and the Z axis is reduced by 98% (0.102 s vs. 4.19 s for the respective comparison with the Lyapunov PID controller), and 99% (0.030 s vs. 3.94 s), respectively, markedly superior compared with each of the two conventional fixed gain controllers.

Figure S13 presents the tracking behavior of the robotic manipulator in the ZX plane for following a rose curve trajectory with three different control strategies. As shown in Figure S13 (a), the Lyapunov PID controller optimized through the MOPSO algorithm exhibits superior tracking performance, with the optimized path well tracing the target path for the entire motion. The controller not optimized, shown in Figure S13 (b) exhibits the rose curve being maintained in overall shape but with clear deformation and significant discrepancies occurring mainly in the petal situated at Z ≈ 1.5 m and X ≈ 0.5 m. Although the overall path is maintained to be smooth and continuous we observe the signs of the deformation and distortion being non-symmetrical and the calculated tracking error being approximately 5–10 mm. Figure S13 (c) is the traditional case for the standard PID controller. In this case, the virtual path is mainly drifted away from the favored rose curve, with instances being the top and the petal on the right. The geometrical shape is obviously distorted, and the path segment is not being well tracked.

**Figure S13** ZX plane trajectory tracking for a rose curve with three different control strategies. (a) Optimized Lyapunov-PID controller using MOPSO with very accurate tracking and low deviation. (b) Non-optimized Lyapunov-PID controller. (c) Standard PID controller.

Figure S14 (a) and (b) show the response for the Lyapunov PID controller optimized with the MOPSO algorithm while tracking a rose curve trajectory for a robotic manipulator. In Figure S14 (a), the cumulative MSE across the X and Z directions decreases with time. The MSE for X starts at approximately and decreases steadily down to the range of with occasional variances. In the Z-direction, the MSE decreases more progressively, reducing below from an initial . Overshoot plots show sharp and frequent peaks during the execution with amplitudes as high as 0.015 m in the two directions. Figure S14 (b) depicts the applied Joint 1 and Joint 2 torque signals. Joint 1 and Joint 2 torques lie between –50 Nm and 50 Nm and between –20 Nm and 20 Nm, respectively. The piecewise non-sinusoidal pattern for both torques shows the response of the controller to the fast varying and non-Euclidean curvature of the rose curve.

**Figure** S**14** (a) Cumulative MSE and overshoot in the X and Z directions for tracking the rose curve trajectory using the MOPSO Lyapunov PID controller. (b) Joint 1 and Joint 2 applied torque signals.

Figure S15 (a) and (b) show the force response and steady-state tracking error for a robotic manipulator tracking a rose curve using a Lyapunov based PID controller with the gains optimized by the MOPSO algorithm. In Figure S15 (a), the end effector force norm has a singular, stepwise action that mirrors the periodic petal formation of the rose curve track. Maximums are of order 100 N and occur on switching on at petal lobe changes and thus mirror points of high acceleration or drastic changes of course. Component forces show the step type action also, with alternation between –20 N and 60 N, and alternation between –20 N and 60 N, with the expected modulation along the alternate geometry of the rose curve track. Figure S15 (b) indicates the steady state tracking error in the X and Z directions. Error profiles have cyclic peaks, typically coinciding with petals of track changes. Peak magnitudes reach 0.02 m, with most of the track below 0.005–0.01 m. These peak magnitudes undoubtedly mirror points of sharp curvature or inversions of track, where tracking is more challenging with drastic changes of course.

**Figure S15***(a)* End-effector force response for rose curve trajectory tracking using a MOPSO optimized Lyapunov PID controller. *(b)* Steady state tracking error in the X and Z directions.

The tracking performance in Figure S16 (a) and (b) is the non-optimized tracking performance for a rose curve trajectory controlled by a Lyapunov PID. In Figure S16 (a), the cumulative MSE for the X and Z axes decreases, even though the convergence is lower as compared with the optimized examples. Graph for the overshoot contains more periodic and sharper peaks with occasional peaks at more than 0.03 m in X, reflecting less accurate transient response. In Figure S16 (b), the profiles for the two joints show apparent oscillations and more variability. Joint 1 torque () is between nearly −35 and 35 N·m, and Joint 2 torque () is between around −10 and 10 N·m. These reflections show more considerable elevated control effort required for the sake of tracking the complicated rose curve trajectory without parameter optimization.

**Figure S16** *(a)* Cumulative MSE and overshoot in the X and Z directions. *(b)* Joint torque responses and under rose curve trajectory tracking using a Lyapunov PID controller without MOPSO optimization.

Figure S17 (a) and (b) illustrate the output from the non-optimized Lyapunov PID controller to track a rose curve path. Figure S17 (a) depicts the end effector force norm and forces in the X and Z axes. The force profiles illustrate notable oscillations and sudden switches with the forces reaching values as high as about 90 N in the X axis and 50 N in the Z-axis, revealing the extent of variability in the magnitude of the controlling effort during the movement. Figure S17 (b) depicts the steady state errors in the X and Z axes. The error signals emerge with various numbers of peaks, and the amplitudes reach about 0.035 m in X and 0.06 m in Z, especially around the transition between trajectories.

**Figure S17** (a) End-effector force norm and components during end-effector tracking of a rose curve path with a non-optimized Lyapunov PID controller. (b) Steady-state tracking errors in the X and Z axes with periodic peaks up to 0.035 m and 0.06 m, respectively.

Figure S18 (a) and (b) indicate the performance of the traditional PID controller tracking the rose curve behavior. In Figure S18 (a), the total MSE decreases over time with the initial value being in X and Z, demonstrating progressive adaptation. Peak overshoots with some spikes exist around 0.035 m for X and 0.06 m for Z. The large and rather chaotic oscillations with the joint torques are depicted in Figure S18 (b), with amplitudes ranging around ±40 Nm for Joint 1 and ~10–10 Nm for Joint 2.

**Figure S18** (a) Accumulative MSE and overshoot in X and Z for a rose-curve movement with a typical PID controller. (b) Joint 1 and joint 2 control torques show erratic oscillation with amplitudes as high as ±40 Nm and ±15 Nm, respectively.

Figure S19 (a) and (b) indicate the end-effector force and steady-state error performance of the X and Z directions for a system controlled by a standard PID controller for following the rose curve trajectory. In Figure S19 (a), the end-effector force norm exhibits several peaks, with a magnitude up to nearly 90 N, all of them at points of inflection in the curve. In Figure S19 (b), the steady-state X-direction error is nearly everywhere below 0.01 m, with very short spikes as high as 0.04 m. The corresponding Z-direction error remains close to 0.005 m for the most part, although peaks as high as 0.06 m occur, all of them primarily at sharp curvature points of rapid direction change.

**Figure S19** End-effector force components (a) and steady-state tracking error (b) for the rose curve trajectory with a PID controller.

The Pareto front for the rose curve path is shown in Figure S20, verifying the trade-off between and the achieved through MOPSO. This Pareto curve identifies Pareto-optimal solutions that most effectively balance tracking accuracy with control, particularly in terms of dealing with the path's non-linear and oscillatory behavior.

**Figure S20** Pareto front for the rose curve path, depicting the Pareto trade-off between ET and EC achieved via MOPSO.

Table S2 presents a detailed quantitative comparison between the three considered control schemes: MOPSO optimized Lyapunov PID, non-optimized Lyapunov PID, and conventional PID. Each of the controllers for Rose curve. Representative performance measures such as steady-state error, MSE, overshoot, total control input, maximum torque, and recovery time from disturbances are reported in order to critically assess and compare the strengths and weaknesses of each scheme.

**Table S2** Control strategy comparison for rose curve tracking

**References**

Draelos M. 2023. Time-Optimal Spiral Trajectories with Closed-Form Solutions. IEEE Robot Autom Lett. 2023. doi: 10.1109/lra.2023.3240361

Saleem, O., Hamza, A., & Iqbal, J. 2024. A Fuzzy-Immune-Regulated Single-Neuron Proportional–Integral–Derivative Control System for Robust Trajectory Tracking in a Lawn-Mowing Robot. *Computers*, *13*(11), 301. https://doi.org/10.3390/computers13110301
