# Supplementary material for: Lyapunov-based control for enhanced trajectory tracking in robotic arms using multi-objective particle swarm optimization
Source: PeerJ journal article supplement (doi:10.7717/peerj-cs.3397), 2025-11-27
Supplement: Table_S1.docx [file Table_S1.docx]

**Table 1** Comparison of the control strategies in spiral trajectory tracking based on gains, overshoot, torque, and recovery time.

| **Parameter** | **MOPSO-Lyapunov-PID (Optimized)** | **Lyapunov-PID (non-Optimized** | **Traditional PID** |
| --- | --- | --- | --- |
|  | [170,490] | [70,110] | [70,110] |
|  | [10,25.54] | [8,24] | [8,24] |
|  | [60,100] | [65,85] | [65,85] |
| Steady-State Error (x(m)) | 0.00308 | 0.00294 | 0.00292 |
| Steady-State Error (z(m)) | 0.00357 | 0.00354 | 0.00349 |
| MSE_x | 9.19e-06 | 1.40e-05 | 1.46e-05 |
| MSE_z | 8.23e-06 | 9.51e-06 | 9.70e-06 |
| Overshoot_x | 0.03937 | 0.03822 | 0.04035 |
| Overshoot_z | 0.01343 | 0.02831 | 0.02854 |
| Total control Effort (Nm*s) | 6197.06 | 6172.58 | 6172.93 |
| Max Torque Joint 1 (Nm) | 44.36 | 39.54 | 40.17 |
| Max Torque Joint 2 (Nm) | 16.67 | 13.45 | 13.89 |
| Recovery after disturbance x(s) | 0.040 | 2.720 | 2.680 |
| Recovery after disturbance z(s) | 0.040 | 0.040 | 1.160 |
