# Supplementary material for: Lyapunov-based control for enhanced trajectory tracking in robotic arms using multi-objective particle swarm optimization
Source: PeerJ journal article supplement (doi:10.7717/peerj-cs.3397), 2025-11-27
Supplement: Table_S2.docx [file Table_S2.docx]

**Table 2** Control strategy comparison for rose curve tracking

| **Parameter** | **MOPSO-Lyapunov-PID (Optimized)** | **Lyapunov-PID (non-Optimized** | **Traditional PID** |
| --- | --- | --- | --- |
|  | [380,495] | [70,110] | [70,110] |
|  | [10,42.27] | [8,24] | [8,24] |
|  | [60,100] | [65,85] | [65,85] |
| Steady-State Error (x(m)) | 0.00059 | 0.00029 | 0.00031 |
| Steady-State Error (z(m)) | 0.00098 | 0.00051 | 0.00048 |
| MSE_x | 4.57e-06 | 8.48e-06 | 8.55e-06 |
| MSE_z | 6.09e-06 | 2.25e-05 | 2.2e-05 |
| Overshoot_x | 0.01813 | 0.03568 | 0.03560 |
| Overshoot_z | 0.01958 | 0.06167 | 0.06187 |
| Total control Effort (Nm*s) | 5674.75 | 5631.10 | 5631.30 |
| Max Torque Joint 1 (Nm) | 45.72 | 38.40 | 39.27 |
| Max Torque Joint 2 (Nm) | 17.49 | 15.87 | 16.23 |
| Recovery after disturbance x(s) | 0.102 | 4.190 | 4.390 |
| Recovery after disturbance z(s) | 0.030 | 3.940 | 4.010 |
